# Supplementary material for: Inhibition of platelet function using liposomal nanoparticles blocks tumor metastasis
Source: PubMed Central journal article supplement — Theranostics. 2017 Feb 26;7(5):1062–71. doi: 10.7150/thno.17908 (PMC5399576; doi:10.7150/thno.17908), 2017-02-26
Supplement: thnov07p1062s1.pdf [file thnov07p1062s1.pdf]

## Supplementary Materials for

### Inhibition of platelet function using liposomal nanoparticles blocks tumor metastasis

Yinlong Zhang<sup>1,2</sup>, Jingyan Wei<sup>1\*</sup>, Shaoli Liu<sup>1,2</sup>, Jing Wang<sup>2</sup>, Xuexiang Han<sup>2</sup>, Hao Qin<sup>2,4</sup>,  
Jiayan Lang<sup>2</sup>, Keman Cheng<sup>2,3</sup>, Yiye Li<sup>2</sup>, Yingqiu Qi<sup>2</sup>, Greg J Anderson<sup>5</sup>, Saraswati Sukumar<sup>6</sup>  
, Suping Li<sup>2\*</sup>, Guangjun Nie<sup>2,4\*</sup>

**Table S1.** Encapsulation efficiency of Ticagrelor into liposome nanoparticles at varying weight ratios of liposome/ticagrelor.

| Liposome:Ticagrelor Ratio                  | 40: 5       | 40: 10      | 40: 15      |
|--------------------------------------------|-------------|-------------|-------------|
| Encapsulation efficiency of Ticagrelor (%) | 85.4 ± 1.28 | 81.4 ± 1.11 | 75.8 ± 0.46 |

The ratio of 40:5 of liposome to ticagrelor was chosen for the current study as high encapsulation efficiency was observed and the nanoparticles had a narrow size distribution.

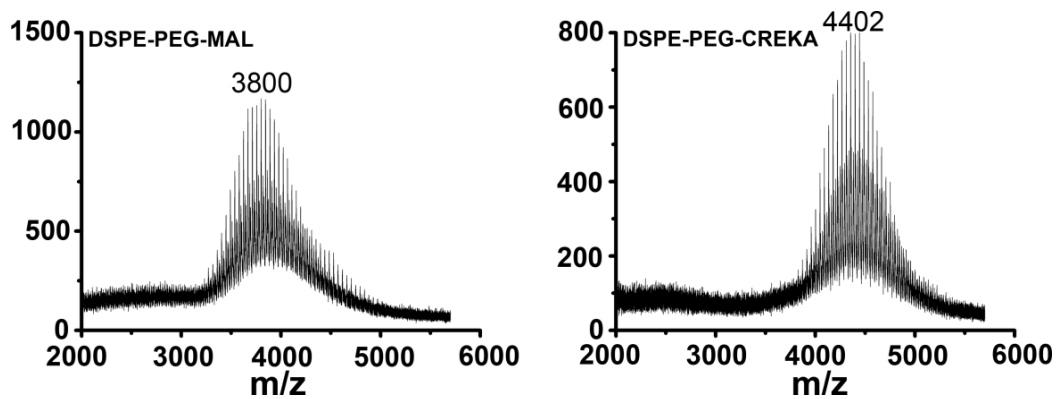

**Figure S1.** MALDI-TOF-MS examination of DSPE-PEG-CREKA conjugation. The molecular weight of DSPE-PEG increased from 3800 (left) to 4402 (right), indicating the successful conjugation of DSPE-PEG and CREKA peptide.

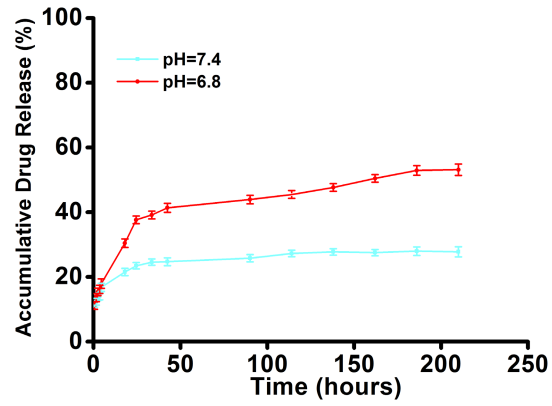

**Figure S2: The drug release profiles of CREKA-Lipo-T at two pH conditions**

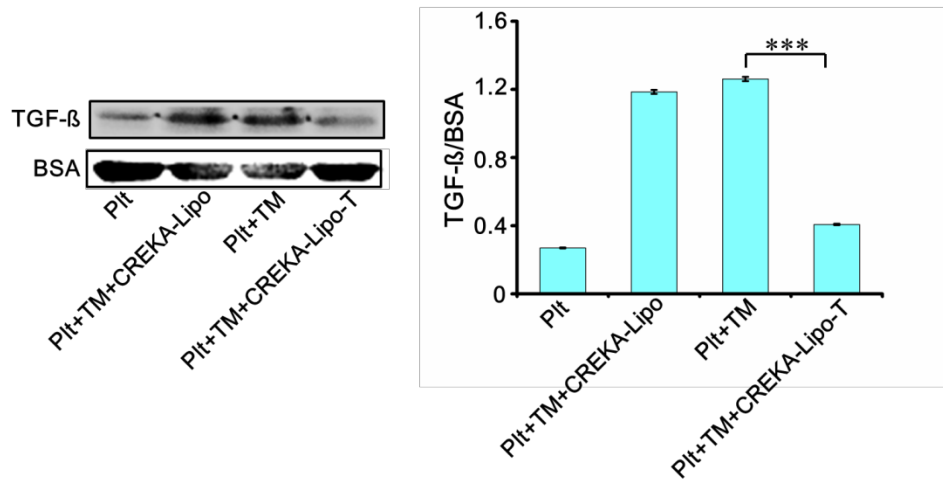

**Figure S3. The inhibition of platelet TGF- $\beta$  secretion by CREKA-Lipo-T. (A)** Western blot analysis shows that conditioned medium from 4T1 tumor cells can stimulate the secretion of TGF- $\beta$  from platelets (Plt), and that CREKA-Lipo-T reduced the secretion of TGF- $\beta$  about 70%, while the CREKA-Lipo group did not show this effect. **(B)** Quantitative analysis of the data in A (n=3). \*\*\* $p$ <0.001. TM: tumor cell conditioned medium, Plt: platelets.

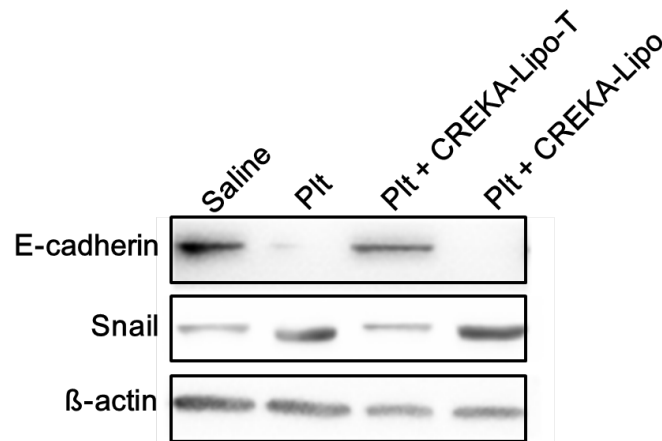

**Figure S4. Expression of EMT markers in 4T1 cells following treatment with different drug formulations.** Western blotting was used to measure the expression of E-cadherin and Snail in 4T1 cells. Low expression of E-cadherin and high expression of Snail indicate the transition of tumor cells from an epithelial to an invasive mesenchymal phenotype when platelets are present. CREKA-Lipo-T, but not CREKA-Lipo abolished this transition effect. Plt: platelets.

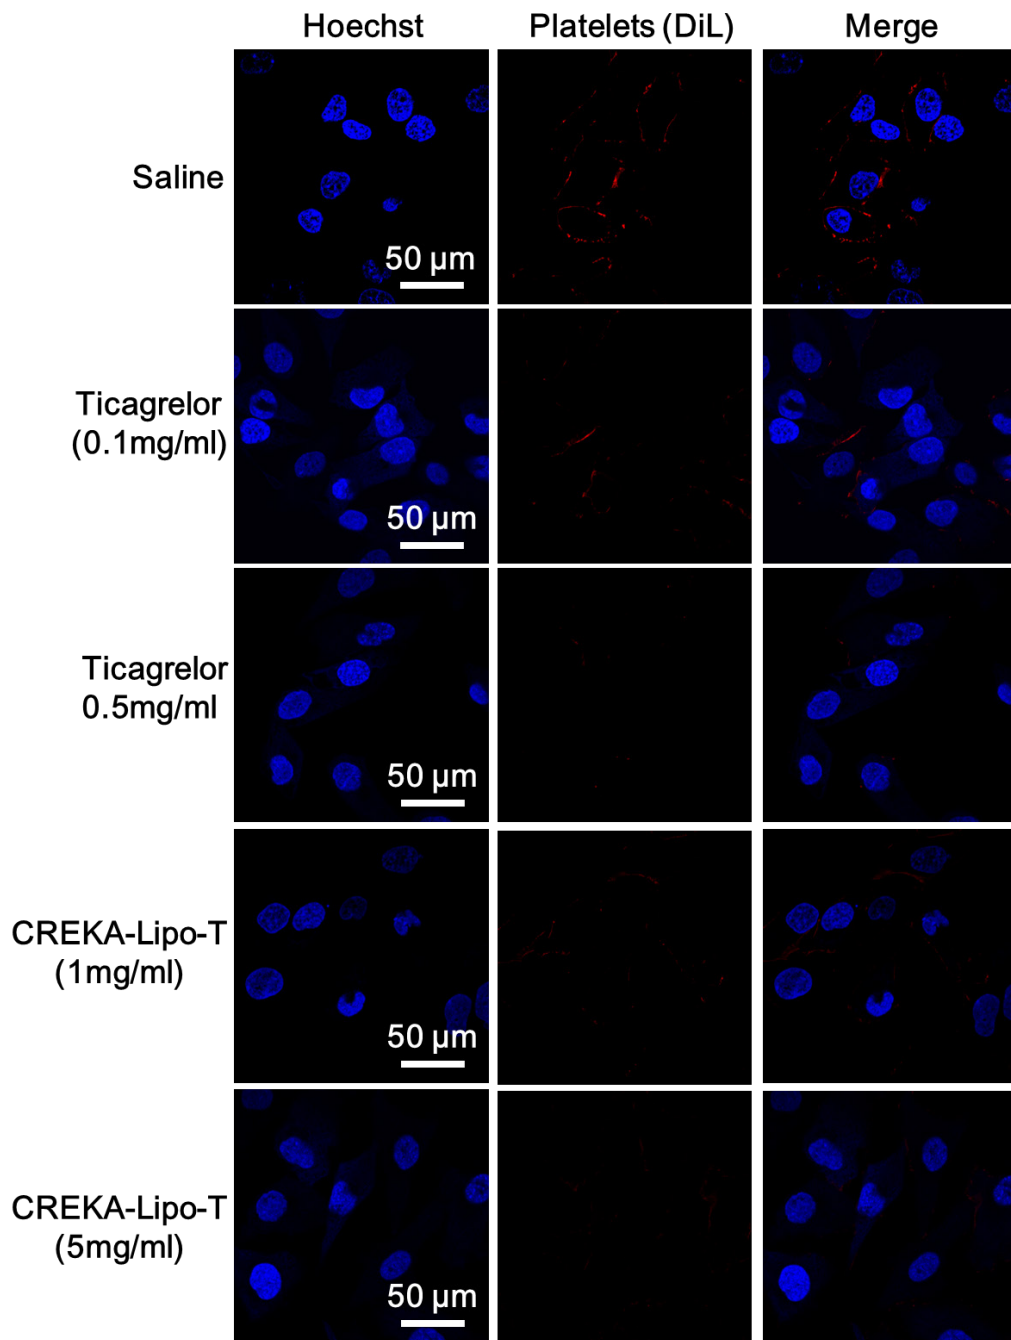

**Figure S5. Ticagrelor and CREKA-Lipo-T impedes the interaction between 4T1 tumor cells and platelets with dose dependent feature.** Platelets (red) were labelled with the fluorescent dye DiL and tumor cell nuclei (blue) were stained with Hoechst 33342.

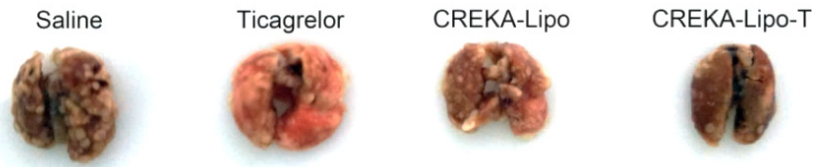

**Figure S6. Gross morphology of the lungs of mice bearing 4T1 tumors treated with different drug formulations.** Fewer metastatic foci were observed on the surface of the lungs from CREKA-Lipo-T treated mice compared to the other experimental groups.

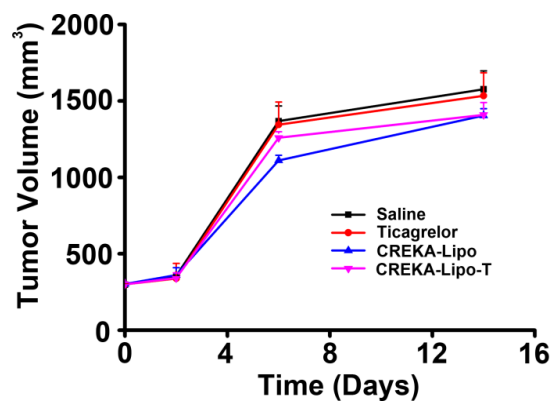

**Figure S7. *In vivo* effects of different drug formulations on primary 4T1 tumor size.** No significant differences were observed between the different groups after treatment with Saline, Ticagrelor, CREKA-Lipo and CREKA-Lipo-T.

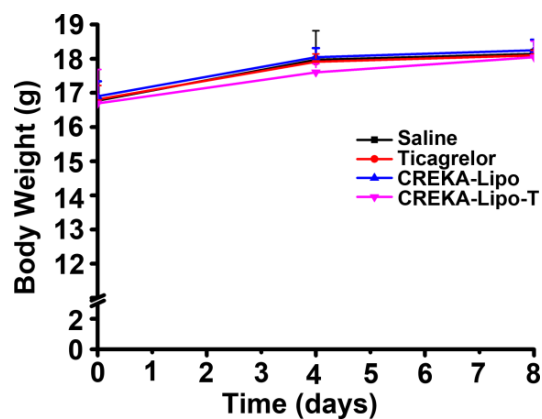

**Figure S8. Body weight of mice treated with different drug formulations.** No apparent changes of body weight were observed in wild-type BALB/c mice after treatment with saline, ticagrelor, CREKA-Lipo or CREKA-Lipo-T, three times every two days (n = 5).
